# Supplementary material
Source: publisher site journal article supplement (https://www.dovepress.com/article/446199)
Supplement: Supplementary file 1 [file get_supplementary_file.php]

**Supplemental table** 1: Comparison of inflammatory factors preoperative and postoperative

| Indicators | Control group  (n=95) | | Research group  (n=103) | | *P*-value |
| --- | --- | --- | --- | --- | --- |
| Preoperative | Postoperative | Preoperative | Postoperative |
| Leukocytes (×109/L) | 14.85±3.52 | 11.97±2.43 | 15.16±3.42 | 9.67±2.25 | <0.001 |
| Lymphocyte (×109/L) | 3.89±0.61 | 2.36±0.95 | 3.85±0.47 | 1.86±0.71 | <0.001 |
| Neutrophils (×109/L) | 9.62±2.93 | 8.14±2.29 | 9.31±2.32 | 5.58±1.78 | <0.001 |
| CRP (mg/L) | 11.05±1.52 | 8.74±1.56 | 11.21±1.55 | 6.84±1.33 | <0.001 |
| IL-6 (ng/L) | 21.02±4.27 | 15.10±3.56 | 20.17±4.49 | 10.39±3.67 | <0.001 |
| IL-8 (ng/L) | 18.91±3.85 | 13.59±3.20 | 18.15±4.04 | 9.36±3.31 | <0.001 |
| TNF-α (ng/L) | 15.28±2.47 | 11.07±1.59 | 14.71±2.87 | 9.15±1.60 | <0.001 |

Note: CRP, C-reactive protein; IL-6, Interleukin-6; IL-8, Interleukin-8; TNF-α, tumor necrosis factor alpha.
